# Supplementary material
Source: PubMed Central journal article supplement (PMC11028140)
Supplement: 262_2018_2151_MOESM1_ESM.pdf [file 262_2018_2151_MOESM1_ESM.pdf]

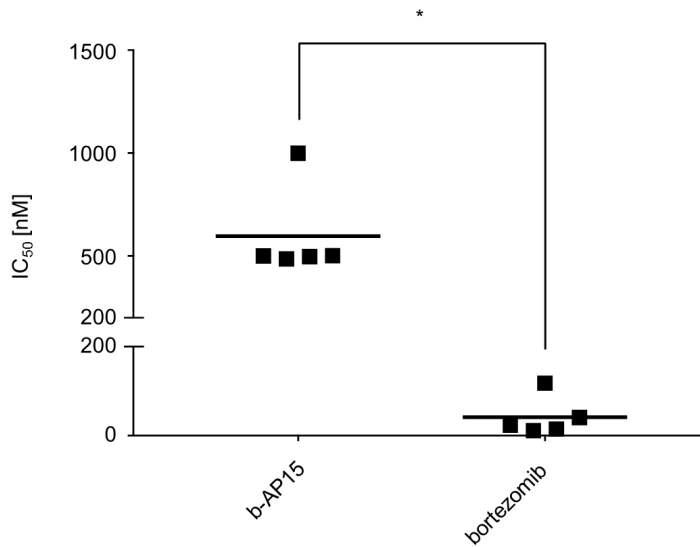

**b-AP15 and bortezomib display different efficacy in MCL cell lines.**

IC<sub>50</sub> values of b-AP15 for all MCL cell lines investigated were derived from the dataset shown in Figure 2b. For determination of IC<sub>50</sub> values of bortezomib, MCL cell lines were exposed to serial 1.5 fold dilutions (17 datapoints each performed in biological triplicates) for 24h and subsequently analyzed using the WST-1 assay. From these dose-response curves IC<sub>50</sub> values were calculated using non-linear regression analysis (variable slope model with a four-parameter dose-response curve). Lines represent means of IC<sub>50</sub> values across all MCL cell lines for each substance. Student's t-test was used to determine significant differences in mean IC<sub>50</sub> values between b-AP15 and bortezomib treated cells (\*p<0.05).

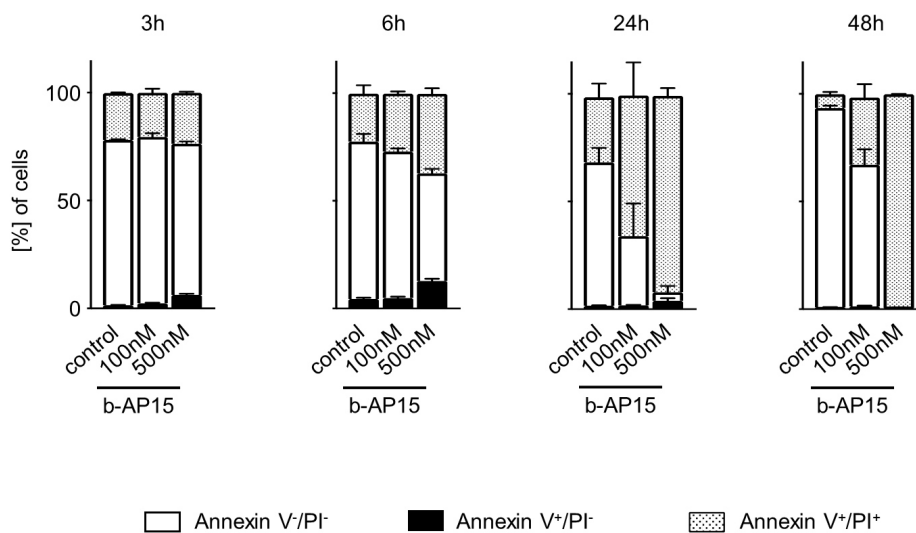

### Time course of b-AP15 induced apoptosis in MCL cells.

JEKO-1 cells were exposed to escalating doses of b-AP15 or DMSO for the indicated period of time. The percentage of live (Annexin V-/PI<sup>-</sup>), early (Annexin V<sup>+</sup>/PI<sup>-</sup>) and late apoptotic/necrotic (Annexin V<sup>+</sup>/PI<sup>+</sup>) MCL cells was determined by FACS with Annexin V/PI staining. Data represent means of three technical replicates. Bars represent SD. One experiment of a total of three with similar results is shown.

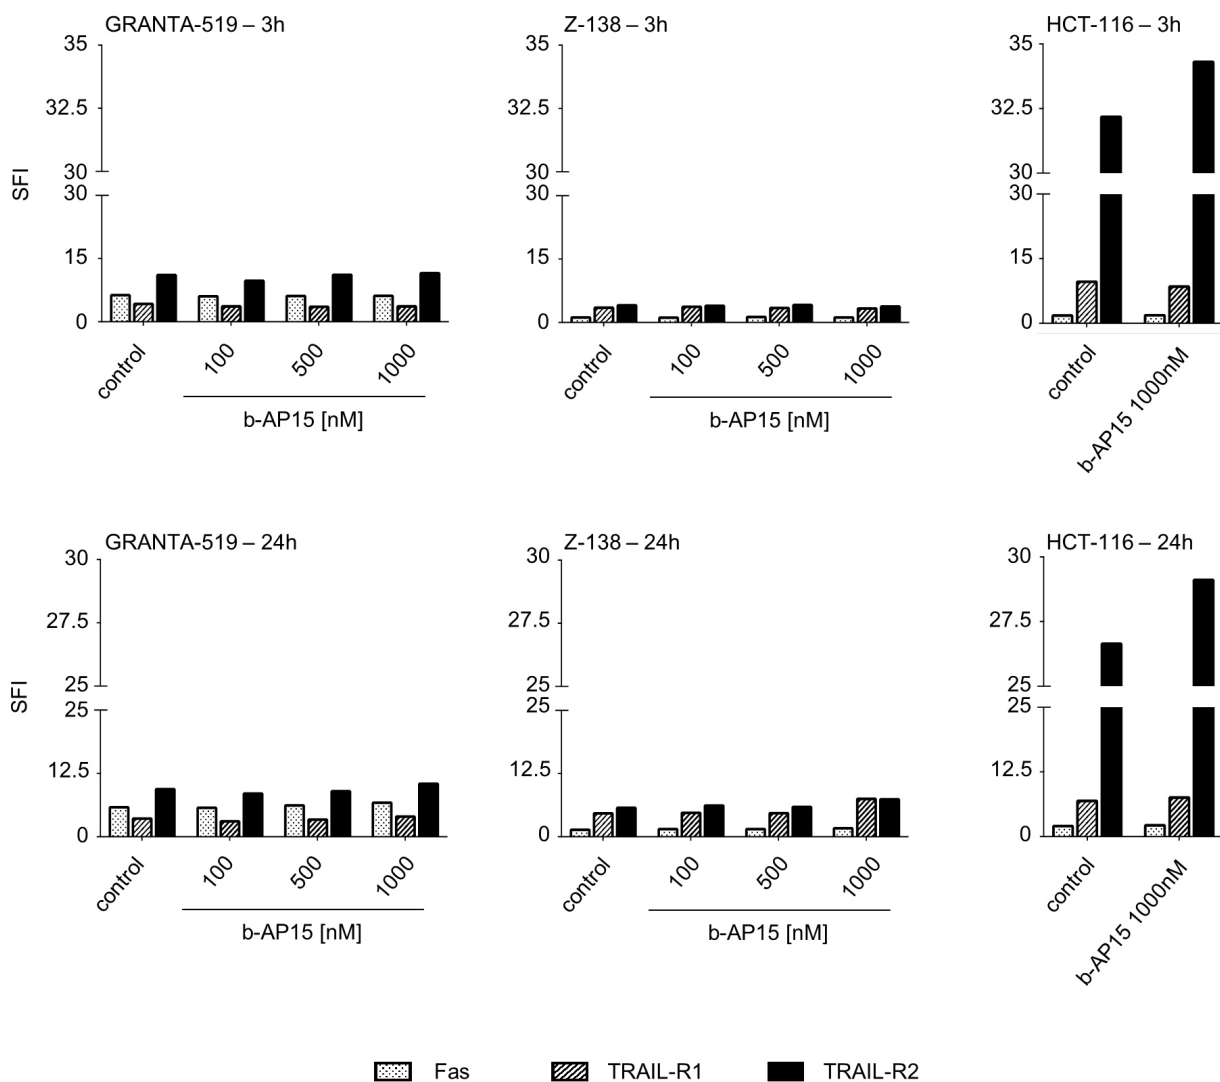

### Effects of b-AP15 on death receptor expression in MCL cell lines and HCT-116 cells.

The MCL cell lines GRANTA-519 and Z-138 as well as the colon carcinoma cell line HCT-116 were exposed to DMSO or the indicated concentration of b-AP15 for either 3h (upper panel) or 24h (lower panel). Following treatment, flow cytometry was used to analyze surface expression of Fas, TRAIL-R1 and TRAIL-R2. Death receptor expression was analyzed on 7AAD negative live cells after exclusion of non-single cells and debris with FSC and SSC.
